# Supplementary material for: An Insilico Analysis: Three Upregulated microRNAs as Potential Diagnostic Biomarkers of Papillary Thyroid Carcinoma (PTC)
Source: Research Square preprint supplement (doi:10.21203/rs.3.rs-7920609/v1), 2025-11-19
Supplement: Supplementary file 1 [file 5299bee3483935d53e5f7333.docx]

**Suppelementary data**

**
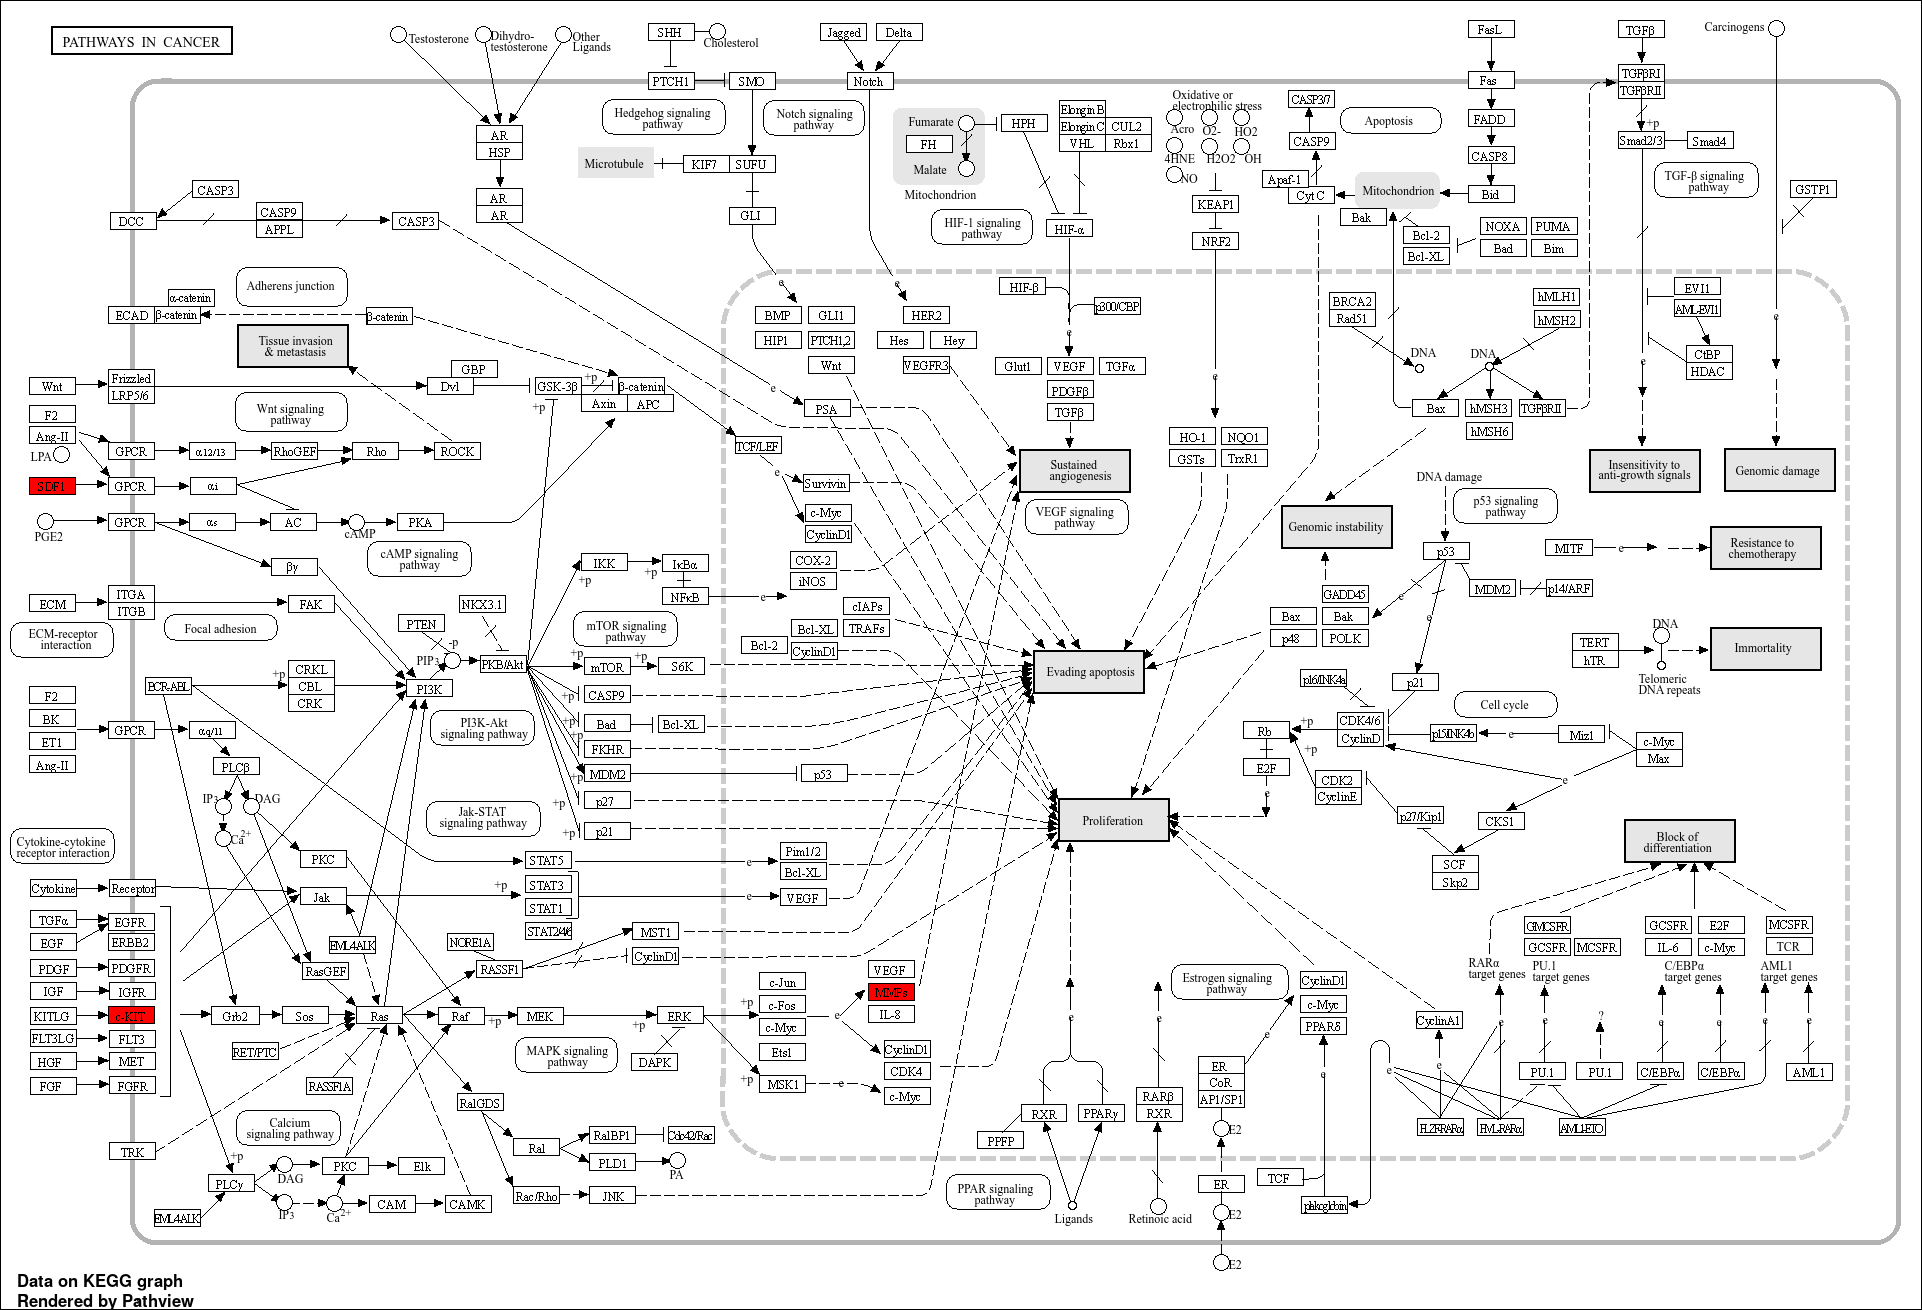
**

**A**

**
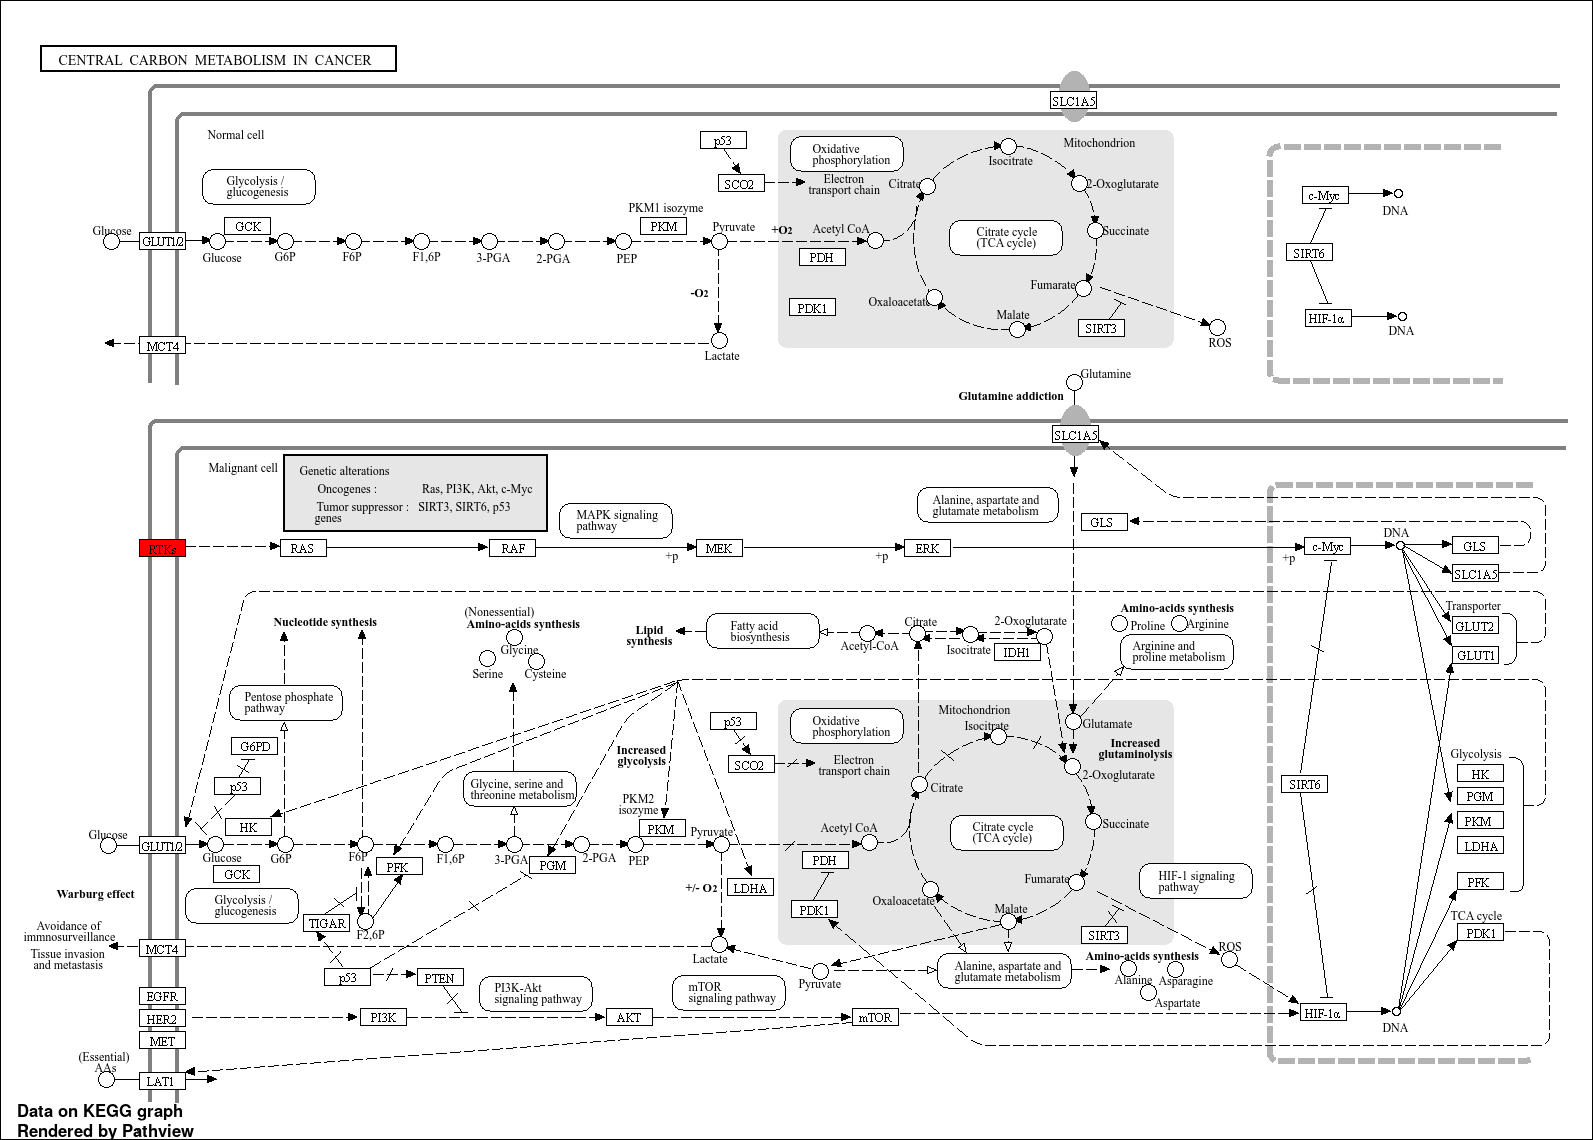
**

**B**

**Supplementary data 1** KEGG Pathway analysis of (A) hsa-miR-221-3p; (B) hsa-miR-222-3p and hsa-miR-146b-5p target genes.
